# Supplementary material for: Comparison of Selenium Nanoparticles and Sodium Selenite on the Alleviation of Early Atherosclerosis by Inhibiting Endothelial Dysfunction and Inflammation in Apolipoprotein E-Deficient Mice
Source: MDPI journal article supplement (doi:10.3390/ijms222111612), 2021-10-27
Supplement: s1 [file s1]

## **Supplementary Information**

### **Comparison of Selenium Nanoparticles and Sodium Selenite on the Alleviation of Early Atherosclerosis by Inhibiting Endothelial Dysfunction and Inflammation in Apolipoprotein E-Deficient Mice**

Xiao Junying, Li Na, Xiao Shengze, Wu Yuzhou and Liu Hongmei

Table S1: Average food intake (g/day/mouse). The results were expressed as mean  $\pm$  SD.

| Age (week) | Model           | Na <sub>2</sub> SeO <sub>3</sub> | CS-SeNPs        |
|------------|-----------------|----------------------------------|-----------------|
| 9          | 2.84 $\pm$ 0.32 | 2.75 $\pm$ 0.18                  | 2.93 $\pm$ 0.16 |
| 10         | 3.26 $\pm$ 0.11 | 3.07 $\pm$ 0.16                  | 3.12 $\pm$ 0.17 |
| 11         | 3.53 $\pm$ 0.16 | 3.28 $\pm$ 0.18                  | 3.12 $\pm$ 0.21 |
| 12         | 3.21 $\pm$ 0.18 | 2.71 $\pm$ 0.18                  | 2.79 $\pm$ 0.18 |
| 13         | 3.39 $\pm$ 0.16 | 2.98 $\pm$ 0.12                  | 2.90 $\pm$ 0.29 |
| 14         | 3.04 $\pm$ 0.13 | 2.76 $\pm$ 0.11                  | 3.08 $\pm$ 0.17 |
| 15         | 2.84 $\pm$ 0.11 | 2.37 $\pm$ 0.13                  | 2.49 $\pm$ 0.13 |
| 16         | 3.42 $\pm$ 0.40 | 2.91 $\pm$ 0.16                  | 3.02 $\pm$ 0.11 |
| 17         | 3.15 $\pm$ 0.20 | 2.65 $\pm$ 0.15                  | 2.61 $\pm$ 0.19 |
| 18         | 2.89 $\pm$ 0.18 | 2.45 $\pm$ 0.15                  | 2.41 $\pm$ 0.27 |

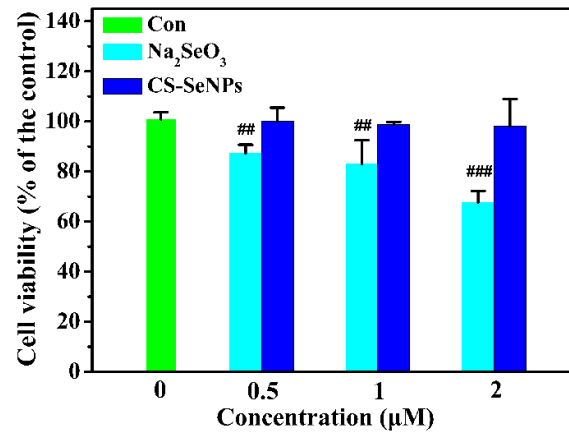

Figure S1: Effect of CS-SeNPs and Na<sub>2</sub>SeO<sub>3</sub> on the viability of human endothelial cell line EA.hy926. Cells were treated with indicated concentrations of CS-SeNPs or Na<sub>2</sub>SeO<sub>3</sub> for 24 h. The cell viability was determined using the MTT assay (mean  $\pm$  SD, n = 4). <sup>##</sup> P < 0.01, <sup>###</sup> P < 0.001, compared with control cells.

Table S2: Primers sequences used for the detection of related gene expression in the aorta of

| ApoE <sup>-/-</sup> mice by qPCR |                                                         |                     |
|----------------------------------|---------------------------------------------------------|---------------------|
| Gene                             | Primer sequence 5' to 3'                                | Product length (bp) |
| TNF- $\alpha$                    | F: ACCCTCACACTCAGATCATCTT<br>R: GGTGTCTTGAGATCCATG      | 125                 |
| IL-6                             | F: CCTTCCTACCCCAATTTCCAA<br>R: AGATGAATTGGATGGTCTTGGTC  | 89                  |
| IL-1 $\beta$                     | F: TGCCACCTTTTGACAGTGATG<br>R: GAGTGATACTGCCTGCCTGA     | 125                 |
| MIP-1 $\alpha$                   | F: CCTCTGTACCTGCTCAACA<br>R: GATGAATTGGCGTGGAATCT       | 163                 |
| MCP-1                            | F: CCACTCACCTGCTGCTACTCAT<br>R: TGGTGATCCTCTTGTAGCTCTCC | 76                  |
| E-selectin                       | F: GTGAAGCTTTGACCCACCCT<br>R: ATTCTGAGCTCCAACTCGCC      | 125                 |
| VCAM-1                           | F: CTGGGAAGCTGGAACGAAGT<br>R: GCCAAACACTTGACCGTGAC      | 115                 |
| ICAM-1                           | F: GTGATGCTCAGGTATCCATCCA<br>R: CACAGTTCTCAAAGCACAGCG   | 213                 |
| $\beta$ -actin                   | F: GATCAAGATCATTGCTCCTCCT<br>R: AGGGTGTAACACGCAGCTCA    | 183                 |

Table S3: Primers sequences used for the detection of related gene expression in human ECs by

qPCR

| Gene          | Primer sequence 5' to 3'                                     | Product length (bp) |
|---------------|--------------------------------------------------------------|---------------------|
| TNF- $\alpha$ | F: GTGACAAGCCTGTAGCCCATGTT<br>R: TTATCTCTCAGCTCCACGCCATT     | 112                 |
| IL-6          | F: ACTCACCTCTTCAGAACGAATTG<br>R: CCATCTTTGGAAGGTTTCAGGTTG    | 149                 |
| IL-1 $\beta$  | F: ATGATGGCTTATTACAGTGGCAA<br>R: GTCGGAGATTTCGTAGCTGGA       | 132                 |
| MCP-1         | F: GCTCATAGCAGCCACCTTCATTC<br>R: GGACACTTGCTGCTGGTGATTC      | 147                 |
| iNOS          | F: GATCAAAAAGTGGGGCAGCG<br>R: CTCATCTGGAGGGGTAGGCT           | 157                 |
| E-selectin    | F: GCACAGCCTTGTCCTCAACC<br>R: ACCTCACCAAACCCCTTCG            | 228                 |
| VCAM-1        | F: GGTATCTGCATCGGGCCTC<br>R: TAAAAGCTTGAGAAGCTGCAAACA        | 193                 |
| ICAM-1        | F: GGAACAACCGGAAGGTGTATG<br>R: TGCCAGTTCCACCCGTTCT           | 140                 |
| GADPH         | F: CACCAGGGCTGCTTTTAACTCTGGTA<br>R: CCTTGACGGTGCCATGGAATTTGC | 131                 |
